# Supplementary material for: Improved three-way catalytic activity of bimetallic Ir–Rh catalysts supported on CeO2–ZrO2
Source: Royal Society of Chemistry journal article supplement (doi:10.1039/c4cy01502a), 2015-01-01
Supplement: c4cy01502a1.pdf [file c4cy01502a1.pdf]

### Electronic supplementary information (ESI)

#### Improved three-way catalytic activity of bimetallic Ir-Rh catalyst supported on CeO<sub>2</sub>-ZrO<sub>2</sub>

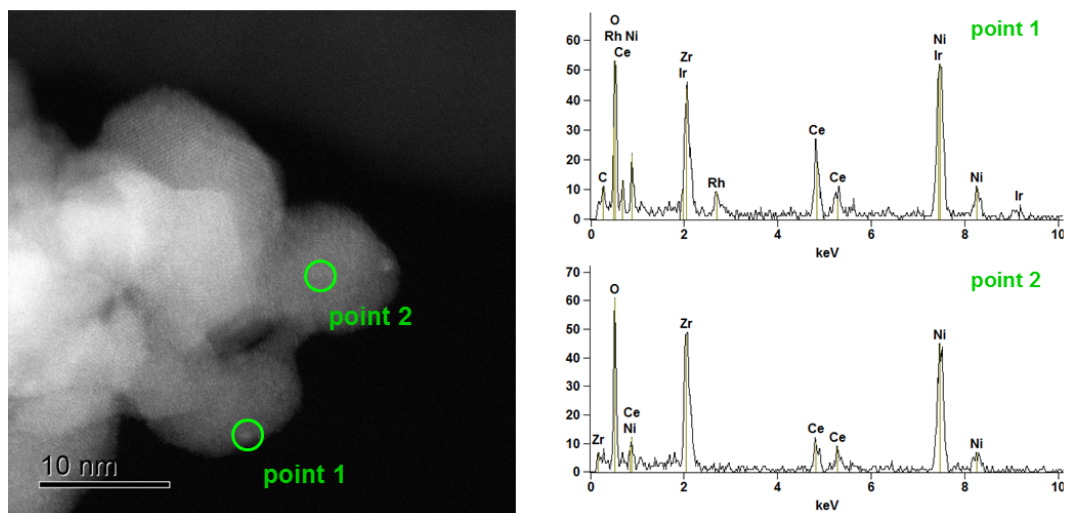

**Fig. S1.** STEM/HAADF images and EDS spectra of Ir-Rh/CeO<sub>2</sub>-ZrO<sub>2</sub> with Ir/Rh=1/9.

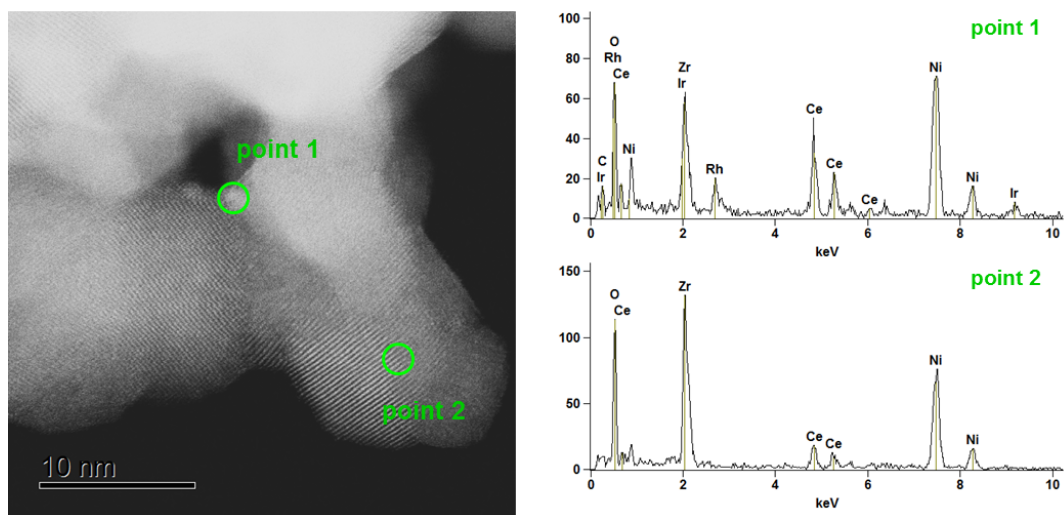

**Fig. S2.** STEM/HAADF images and EDS spectra of Ir-Rh/CeO<sub>2</sub>-ZrO<sub>2</sub> with Ir/Rh=1/1.

As can be seen in **Figs. S1 and S2**, the Rh and Ir species were found to be present at point 1 for Ir-Rh/CeO<sub>2</sub>-ZrO<sub>2</sub> with Ir/Rh = 1/9 and 1/1, suggesting the formation of Ir-Rh nanoparticles.
